# Supplementary material for: Endocannabinoid dynamics gate spike-timing dependent depression and potentiation
Source: eLife journal article supplement (doi:10.7554/elife.13185), 2016-02-27
Supplement: supp [file elife-13185-supp-v1.zip]

## Supplementary file 1A: Parameters of the mathematical model – intracellular dynamics

| Description                              | Name          | Values  | Units                     | Reference                                       |
|------------------------------------------|---------------|---------|---------------------------|-------------------------------------------------|
| I <sub>NMDAR</sub> to Ca flow conversion | $\xi_{NMDAR}$ | 98      | $\mu\text{M}/\text{pCol}$ | set to match Ca <sup>2+</sup> amplitudes in [1] |
| I <sub>VSCC</sub> to Ca flow conversion  | $\xi_{VSCC}$  | 140     | $\mu\text{M}/\text{pCol}$ | set to match Ca <sup>2+</sup> amplitudes in [2] |
| I <sub>TRPV1</sub> to Ca flow conversion | $\xi_{TRPV1}$ | 290     | $\mu\text{M}/\text{pCol}$ | set to match Ca <sup>2+</sup> amplitudes in [1] |
| Total endogenous Ca buffer               | $B_T$         | 4.5     | $\mu\text{M}$             | Estimated from our experimental data            |
| Basal cytoplasmic [Ca]                   | $Ca_b$        | 0.1     | $\mu\text{M}$             | [1,3]                                           |
| Time scale for Ca exit                   | $\tau_{Ca_b}$ | 0.007   | s                         | Idem                                            |
| Endogenous Ca buffer affinity            | $K_{dB}$      | 0.5     | $\mu\text{M}$             | [3,4]                                           |
| ER-to-cytosol volume ratio               | $\rho_{ER}$   | 0.3     | -                         | Adapted from [4]                                |
| IP3R binding rate (inactivation)         | $a_2$         | 0.5     | $\mu\text{M}/\text{s}$    | Idem                                            |
| Maximal SERCA pump rate                  | $v_{ER}$      | 8       | $\mu\text{M}/\text{s}$    | Idem                                            |
| IP3R affinity for IP3                    | $d_3$         | 0.9434  | $\mu\text{M}$             | [5]                                             |
| Maximal IP3R rate                        | $r_C$         | 4       | 1/s                       | Adapted from [5]                                |
| Basal [Ca] in the ER                     | $Ca_{ER,b}$   | 65      | $\mu\text{M}$             | [6]                                             |
| Ca leak from the ER                      | $r_l$         | 0.1     | 1/s                       | [5]                                             |
| IP3R affinity for Ca                     | $d_5$         | 0.12    | $\mu\text{M}$             | Adapted from [5]                                |
| IP3R dissociation constant               | $d_2$         | 3.049   | $\mu\text{M}$             | Idem                                            |
| SERCA pump affinity for Ca               | $K_{ER}$      | 0.05    | $\mu\text{M}$             | [5]                                             |
| IP3R affinity for IP3                    | $d_1$         | 0.13    | $\mu\text{M}$             | Idem                                            |
| PLC $\delta$ product inhibition          | $\kappa_d$    | 1.5     | $\mu\text{M}$             | Idem                                            |
| PLC $\delta$ Ca-activation               | $K_\delta$    | 0.1     | $\mu\text{M}$             | Idem                                            |
| 5P-IP maximal rate                       | $r_{5P}$      | 0.2     | 1/s                       | Adapted from [5]                                |
| PI3K maximal rate                        | $v_{3K}$      | 0.001   | $\mu\text{M}/\text{s}$    | Idem                                            |
| PI3K Ca-activation constant              | $K_D$         | 1.5     | $\mu\text{M}$             | Idem                                            |
| PLC $\delta$ maximal rate                | $v_\delta$    | 0.02    | $\mu\text{M}/\text{s}$    | [5]                                             |
| PI3K affinity for IP3                    | $K_3$         | 1       | $\mu\text{M}$             | Idem                                            |
| Glutamate affinity to mGluR              | $K_R$         | 1.3     | $\mu\text{M}$             | Idem                                            |
| regulation by PLC $\beta$ termination    | $K_p$         | 10      | $\mu\text{M}$             | Idem                                            |
| PLC $\beta$ maximal rate                 | $v_\beta$     | 0.8     | $\mu\text{M}/\text{s}$    | Adapted from [5]                                |
| PKC Ca-activation constant               | $K_\pi$       | 0.6     | $\mu\text{M}$             | [5]                                             |
| Total CaMKII $\alpha$ concentration      | $CaMK_{tot}$  | 16.6    | $\mu\text{M}$             | [7]                                             |
| Total Calmodulin concentration           | $CaM_{tot}$   | 0.07085 | $\mu\text{M}$             | Adapted from [7]                                |
| PKA Hill number                          | $n_{PKA}$     | 3       | -                         | Idem                                            |

Referenced articles: [1] Sabatini, B.L., Oertner, T.O. and Svoboda, K. (2002) *Neuron* 33(3):439-452 [2] Carter, A.G. and Sabatini, B.L. (2004) *Neuron* 44(3):483-493 [3] Jackson, M.B. and Redman, S.J. (2003) *J Neurosci* 23:1612–1621 [4] Nägerl, U.V. *et al.* (2000) *Biophys J* 79: 3009–3018 [5] De Pittà M. *et al.* (2009) *J Biol Phys* 35:383-411 [6] Solovyova, N. *et al.* (2002) *EMBO J* 21:622-630 [7] Graupner, M. and Brunel, N. (2007) *PLoS Comput Biol* 3:e221.

## Supplementary file 1B: Parameters of the mathematical model – electrophysiology

| Description                                  | Name             | Values     | Units                          | Reference                                                               |
|----------------------------------------------|------------------|------------|--------------------------------|-------------------------------------------------------------------------|
| TRPV1R max. conductance                      | $g_{TRPV1}$      | 0.0003     | nS                             | Estimated from our experimental data                                    |
| Permeability of L-type VSCC                  | $P_{VSCC}$       | 0.00000102 | $\mu\text{M/s}$                | Value of [1], scaled to $\sim 5,000$ spines, radius $1 \mu\text{m}$     |
| AMPA maximal conductance                     | $g_{AMPA}$       | 5.1        | nS                             | Estimated from our experimental data                                    |
| AMPA closing rate constant                   | $\beta_{AMPA}$   | 190        | 1/s                            | Adapted from [2]                                                        |
| AMPA opening rate constant                   | $\alpha_{AMPA}$  | 1.02       | $1/(\mu\text{M}\cdot\text{s})$ | Idem                                                                    |
| NMDAR maximal conductance                    | $g_{NMDAR}$      | 1.53       | nS                             | Estimated from our experimental data                                    |
| Magnesium concentration                      | Mg               | 1          | mM                             | Directly measured in our experiments                                    |
| NMDAR opening rate constant                  | $\alpha_{NMDAR}$ | 0.072      | $1/(\mu\text{M}\cdot\text{s})$ | Set to emulate the experimental kinetics of NMDAR-transported Ca in [3] |
| NMDAR closing rate constant                  | $\beta_{NMDAR}$  | 100        | 1/s                            | Idem                                                                    |
| Resting membrane potential                   | $V_L$            | -70        | mV                             | Directly measured in our experiments                                    |
| Leak conductance                             | $g_L$            | 10         | nS                             | Idem                                                                    |
| Membrane capacitance                         | $C_m$            | 0.1        | nF                             | Idem                                                                    |
| Extracellular Ca <sup>2+</sup> concentration | $Ca_{out}$       | 5000       | $\mu\text{M}$                  | [1]                                                                     |
| Duration of depolarization step              | $DC_{dur}$       | 0.03       | s                              | From the experimental stimulation protocol                              |
| Amplitude of depolarization step             | $DC_{max}$       | 495        | pA                             | Idem                                                                    |
| Amplitude of action current                  | $AP_{max}$       | 7020       | pA                             | [4]                                                                     |
| Time constant of action current              | $\tau_{bAP}$     | 0.001      | s                              | Idem                                                                    |
| Glutamate peak concentration in the cleft    | $G_{max}$        | 2000       | $\mu\text{M}$                  | Estimated from our experimental data                                    |
| Glutamate decay time constant in the cleft   | $\tau_G$         | 0.005      | s                              | Estimated from our experimental data                                    |
| Delay to bAP outset                          | $\delta$         | 0.015      | s                              | From the experimental stimulation protocol                              |
| Stimulation frequency                        | Frequency        | 1          | Hz                             | From the experimental stimulation protocol                              |

Referenced articles: [1] Wolf, J.A. *et al.* (2005) *J Neurosci* 25(40):9080-9095 [2] Destexhe, A., Mainen, Z., and Sejnowski, T. (1994) *J Comput Neurosci* 1:195-230 [3] Sabatini, B.L., Oertner, T.O. and Svoboda, K. (2002) *Neuron* 33(3):439-452 [4] Fino, E., *et al.* (2010) *J Physiol* 588:3045-3062.

## Supplementary file 1C: Parameters of the mathematical model – endocannabinoid dynamics

| Description                                                   | Name                   | Values   | Units                                  | Reference                                                                          |
|---------------------------------------------------------------|------------------------|----------|----------------------------------------|------------------------------------------------------------------------------------|
| Scaling factor for endocannabinoid contribution to plasticity | $k_{CB1R}$             | 3000     | 1/ $\mu$ M                             | Estimated from our experimental data                                               |
| AEA efficiency for CB1R activation (compared to 2-AG)         | $\alpha$               | 0.1      | -                                      | Idem                                                                               |
| presynaptic plasticity time scale                             | $P_1$                  | 1e-9     | s                                      | Set to yield rapid / slow changes of Wpre for high / low 2-AG values, respectively |
| presynaptic plasticity time scale                             | $P_2$                  | 1e-5     | -                                      | Idem                                                                               |
| presynaptic plasticity time scale                             | $P_3$                  | 7        | -                                      | Idem                                                                               |
| presynaptic plasticity time scale                             | $P_4$                  | 2        | s                                      | Idem                                                                               |
| The lower limit of LTD induction                              | $\theta_{LTD}^{start}$ | 0.027    | -                                      | Estimated from our experimental data                                               |
| The upper limit of LTD induction                              | $\theta_{LTD}^{stop}$  | 0.047    | -                                      | Idem                                                                               |
| The constant determining the rate of LTD induction            | $A_{LTD}$              | 0.65     | -                                      | Idem                                                                               |
| The lower limit of LTP induction                              | $\theta_{LTP}^{start}$ | 0.087    | -                                      | Idem                                                                               |
| The constant determining the rate of LTP induction            | $A_{LTP}$              | 10.8     | -                                      | Idem                                                                               |
| CB1R opening rate constant                                    | $\alpha_{CB1R}$        | 0.2402   | 1/( $\mu$ M.s)                         | Idem                                                                               |
| CB1R closing rate constant                                    | $\beta_{CB1R}$         | 11.072   | 1/s                                    | Idem                                                                               |
| CB1R desensitization rate constant                            | $\gamma_{CB1R}$        | 416.38   | 1/s                                    | Idem                                                                               |
| CB1R closing rate constant                                    | $\epsilon_{CB1R}$      | 0.047796 | 1/s                                    | Idem                                                                               |
| DAGL $\alpha$ affinity for DAG                                | $K_{DAGL}$             | 30       | $\mu$ M                                | [1]                                                                                |
| Maximal rate of MAG lipase                                    | $r_{MAGL}$             | 0.5      | $\mu$ M/s                              | Set for rapid turnover dynamics.                                                   |
| Maximal DAGL $\alpha$ rate                                    | $r_{DGL}$              | 20000    | $\mu$ M/s                              | Idem                                                                               |
| Maximal DAG kinase activity                                   | $r_{DAGK}$             | 2        | $\mu$ M/s                              | Idem                                                                               |
| Hill number for DAGL activation by Ca                         | $n_c$                  | 6        | -                                      | Estimated from our experimental data                                               |
| DAGL dephosphorylation rate                                   | $r_p$                  | 380      | s <sup>-1</sup>                        | Idem                                                                               |
| DAGL phosphorylation rate                                     | $r_k$                  | 50       | $\mu$ M <sup>-1</sup> .s <sup>-1</sup> | Idem                                                                               |
| Total DAGL concentration                                      | $DAGL$                 | 1        | $\mu$ M                                | Idem                                                                               |
| N-acetyltransferase activity                                  | $v_{AT}$               | 0.2      | 1/s                                    | Idem                                                                               |
| FAAH Michaelis-Menten constant                                | $K_{FAAH}$             | 1        | $\mu$ M                                | [1]                                                                                |
| FAAH enzyme activity                                          | $r_{FAAH}$             | 4        | $\mu$ M/s                              | Estimated from our experimental data                                               |

Referenced articles: [1] Okamoto, Y. et al. (2004) *J Biol Chem* 279:5298-5305.
