# Supplementary figures and images for: Endocannabinoid dynamics gate spike-timing dependent depression and potentiation
Source: eLife journal article supplement (doi:10.7554/elife.13185), 2016-02-27

Figure 5 - Figure Supplement 1

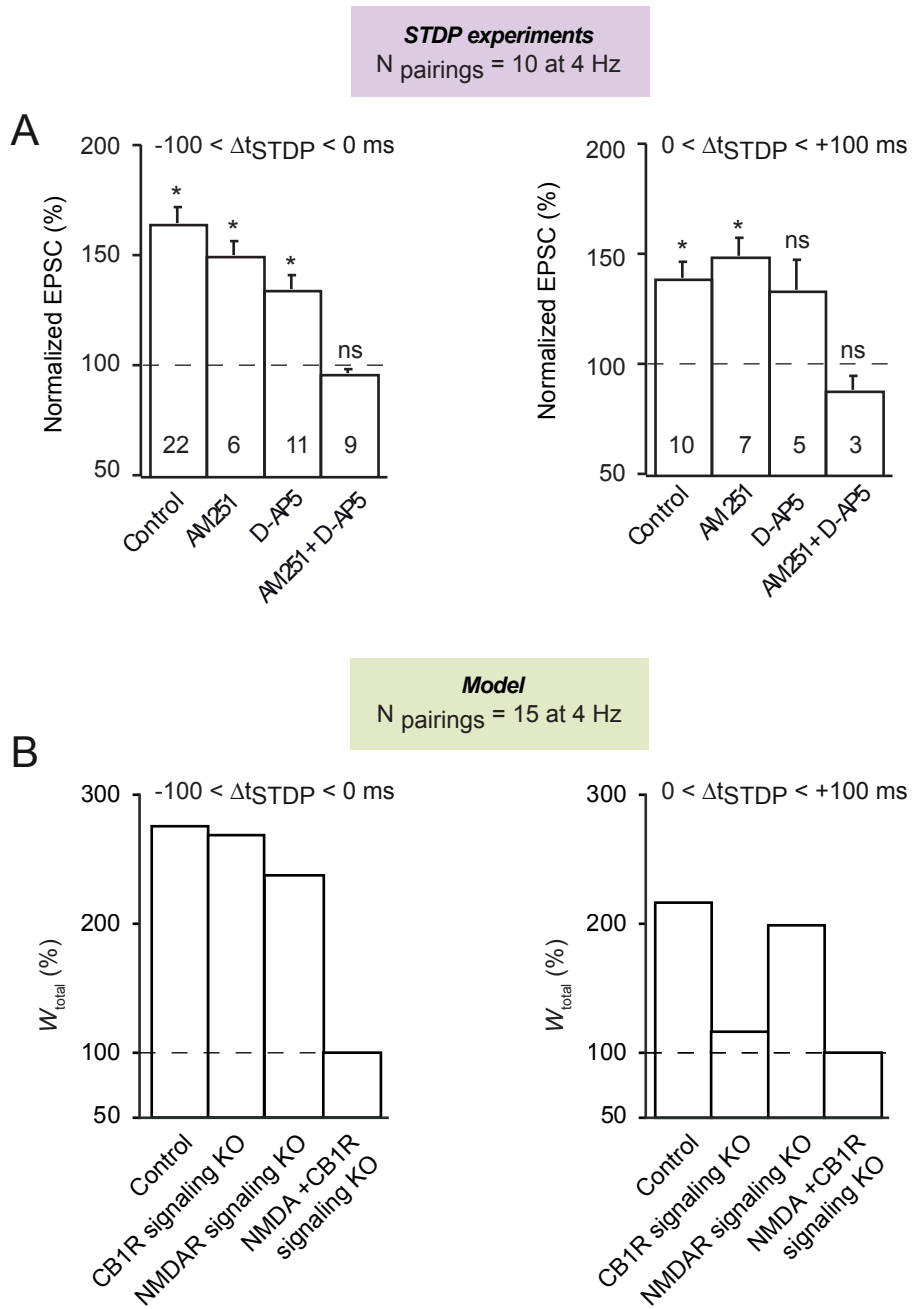

Supplement: supp [file elife-13185-supp-v1.zip]

Figure10 - Figure Supplement 1

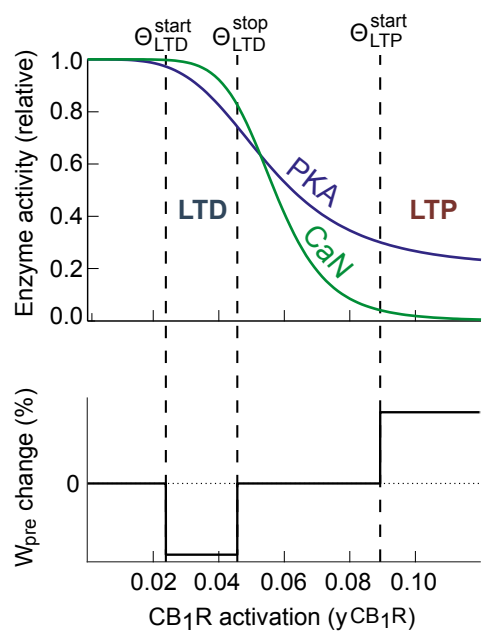

Supplement: supp [file elife-13185-supp-v1.zip]

Figure 4 - Figure Supplement 1

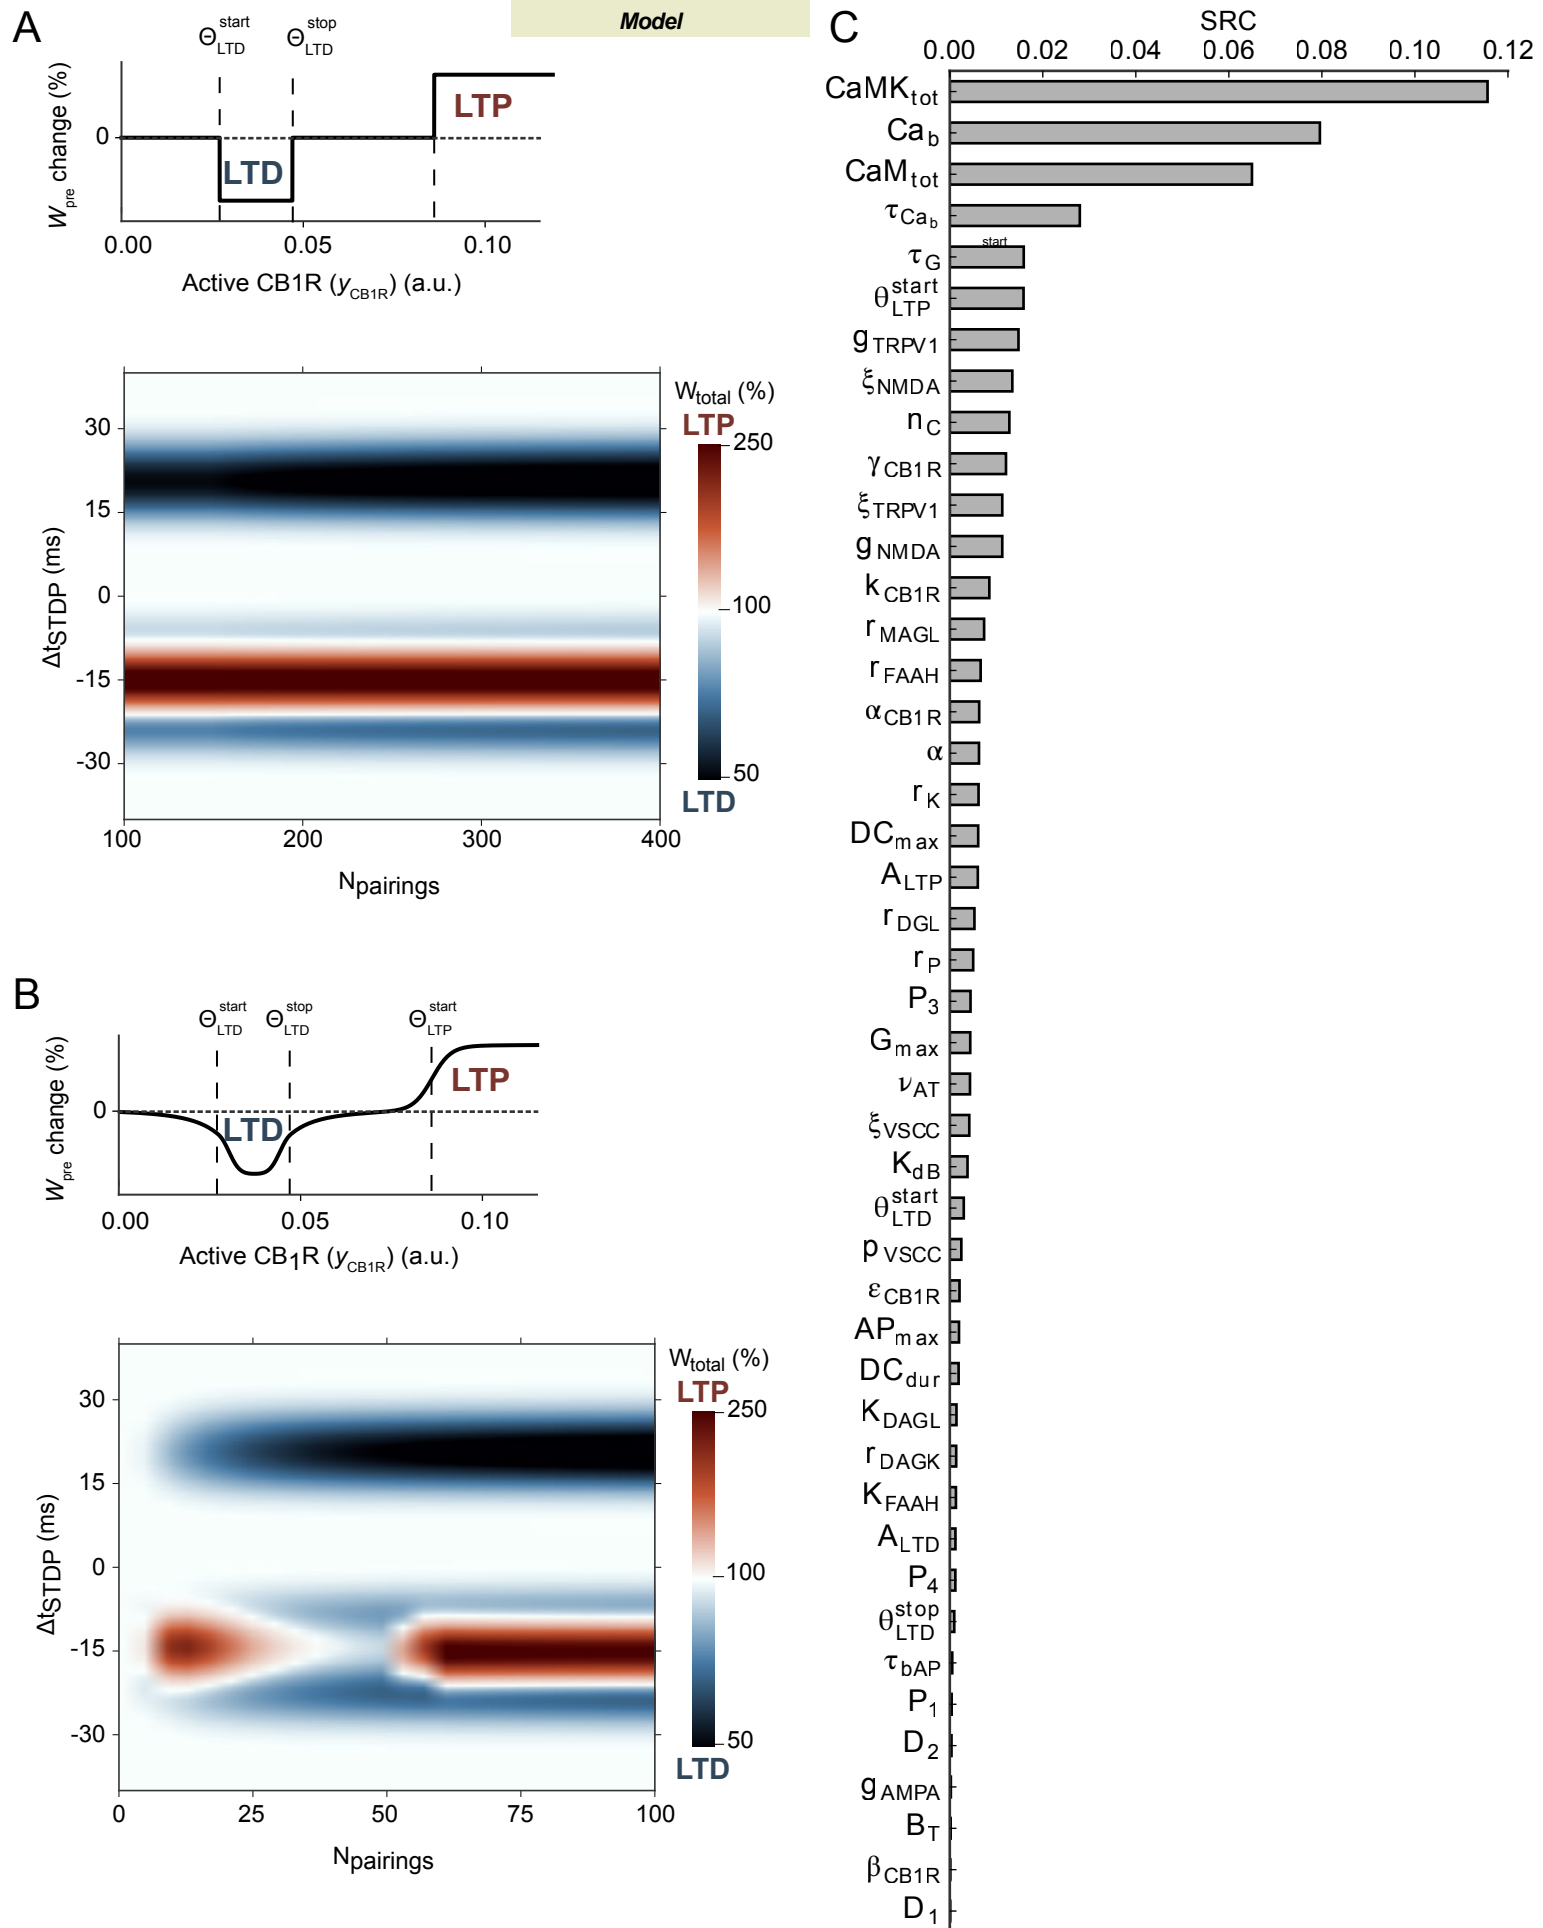

Supplement: supp [file elife-13185-supp-v1.zip]

Figure 1 - Figure Supplement 1

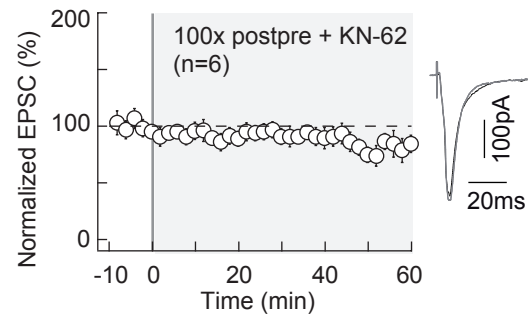

Supplement: supp [file elife-13185-supp-v1.zip]
